# Supplementary material
Source: PubMed Central journal article supplement (PMC2818879)
Supplement: NIHMS167755-supplement-1_si_001.pdf [file NIHMS167755-supplement-1_si_001.pdf]

**Development of (S)-N<sup>6</sup>-(2-(4-(Isoquinolin-1-yl)piperazin-1-yl)ethyl)-N<sup>6</sup>-propyl-4,5,6,7-tetrahydrobenzo[d]-thiazole-2,6-diamine and its analogue as a D3 receptor preferring agonist: Potent in vivo activity in Parkinson's disease animal models**

Balaram Ghosh,<sup>1</sup> Tamara Antonio,<sup>2</sup> , Juan Zhen<sup>2</sup>, Prashant Kharkar,<sup>1</sup> Maarten E.

A. Reith,<sup>2</sup> Alope K. Dutta.<sup>1</sup>

1. Wayne State University, Department of Pharmaceutical Sciences, Detroit, MI

48202

2. New York University, Department of Psychiatry, New York, N.Y. 10016

**Elemental Analysis**

| Compound | Elemental Analysis |      |       |       |      |       |
|----------|--------------------|------|-------|-------|------|-------|
|          | Calculated         |      |       | Found |      |       |
|          | C                  | H    | N     | C     | H    | N     |
| 14a      | 59.13              | 7.53 | 7.13  | 59.09 | 7.15 | 6.92  |
| 14b      | 62.98              | 7.29 | 7.60  | 62.83 | 7.43 | 7.35  |
| 20a      | 52.77              | 7.15 | 8.79  | 52.73 | 6.80 | 8.40  |
| 20b      | 55.05              | 6.11 | 7.55  | 54.97 | 6.13 | 7.65  |
| 20c      | 58.06              | 7.27 | 9.67  | 58.12 | 7.38 | 9.43  |
| 20d      | 56.61              | 7.28 | 8.80  | 57.00 | 7.33 | 8.45  |
| 20e      | 56.61              | 7.28 | 8.80  | 56.67 | 7.43 | 8.63  |
| 24a      | 48.40              | 6.62 | 12.54 | 48.77 | 6.76 | 12.68 |
| 24b      | 50.34              | 6.42 | 14.09 | 50.30 | 6.75 | 13.72 |
| 24c      | 45.75              | 5.05 | 9.15  | 45.85 | 5.05 | 9.18  |

|     |       |      |       |       |      |       |
|-----|-------|------|-------|-------|------|-------|
| 24d | 49.19 | 6.82 | 11.71 | 49.10 | 6.65 | 11.33 |
|-----|-------|------|-------|-------|------|-------|
